# Supplementary material for: Modelling viscoelastic relaxation mechanisms in thermorheologically complex Fe(iii)–poly(acrylic acid) hydrogels
Source: Royal Society of Chemistry journal article supplement (doi:10.1039/d2sm01122k), 2022-01-01
Supplement: d2sm01122k1.pdf [file d2sm01122k1.pdf]

## Electronic Supplementary Information:

### Modelling viscoelastic relaxation mechanisms in thermorheologically complex Fe(III)-poly(acrylic acid) hydrogels

Arthur Lenocho<sup>a,b</sup>, Monika Schönhoff<sup>a,b</sup>, Cornelia Cramer<sup>a,b</sup>

<sup>a</sup> Center for Soft Nanoscience, Busso-Peuss-Str. 10, 48149 Münster, Germany.

<sup>b</sup> Institut für Physikalische Chemie, University of Münster, Corrensstraße 28/30, 48149 Münster, Germany.

**E-mail:** [cramerc@uni-muenster.de](mailto:cramerc@uni-muenster.de)

#### ESI1 Real and imaginary parts of complex moduli

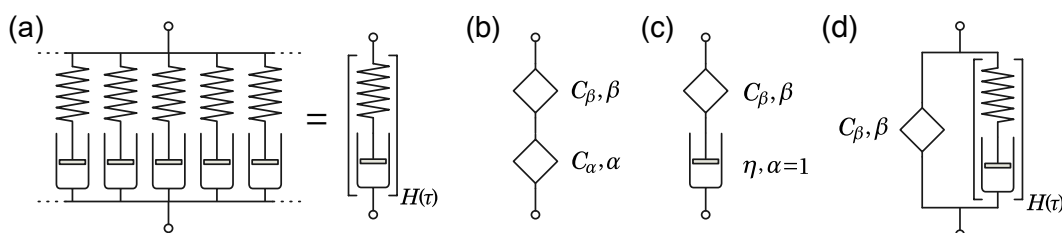

(a) Generalized Maxwell Model (GMM)

$$\begin{aligned}\hat{G}(\omega) &= G' + iG'' = \int_{-\infty}^{\infty} H(\tau) \frac{i\omega\tau}{1+i\omega\tau} d\ln\tau \\ G'(\omega) &= \int_{-\infty}^{\infty} H(\tau) \frac{(\omega\tau)^2}{1+(\omega\tau)^2} d\ln\tau \\ G''(\omega) &= \int_{-\infty}^{\infty} H(\tau) \frac{\omega\tau}{1+(\omega\tau)^2} d\ln\tau\end{aligned}$$

(c) Fractional Maxwell Liquid (FML)

$$\begin{aligned}\hat{G}(\omega) &= G' + iG'' = \frac{\eta C_{\beta} (i\omega)^{\beta}}{\eta + C_{\beta} (i\omega)^{\beta-1}} \\ G'(\omega) &= \frac{\eta^2 C_{\beta} \omega^{2+\beta} \cos\left(\frac{\pi}{2}\beta\right)}{(\eta\omega)^2 + (C_{\beta}\omega^{\beta})^2 + 2\eta C_{\beta} \omega^{1+\beta} \cos\left(\frac{\pi}{2}(1-\beta)\right)} \\ G''(\omega) &= \frac{\eta C_{\beta} \omega^{1+\beta} [C_{\beta} \omega^{\beta} + \eta \omega \sin\left(\frac{\pi}{2}\beta\right)]}{(\eta\omega)^2 + (C_{\beta}\omega^{\beta})^2 + 2\eta C_{\beta} \omega^{1+\beta} \cos\left(\frac{\pi}{2}(1-\beta)\right)}\end{aligned}$$

(b) Fractional Maxwell Model (FMM)

$$\begin{aligned}\hat{G}(\omega) &= G' + iG'' = \frac{C_{\alpha} (i\omega)^{\alpha} \cdot C_{\beta} (i\omega)^{\beta}}{C_{\alpha} (i\omega)^{\alpha} + C_{\beta} (i\omega)^{\beta}} \\ G'(\omega) &= \frac{C_{\alpha} \omega^{\alpha} C_{\beta} \omega^{\beta} [C_{\beta} \omega^{\beta} \cos\left(\frac{\pi}{2}\alpha\right) + C_{\alpha} \omega^{\alpha} \cos\left(\frac{\pi}{2}\beta\right)]}{(C_{\alpha} \omega^{\alpha})^2 + (C_{\beta} \omega^{\beta})^2 + 2C_{\alpha} \omega^{\alpha} C_{\beta} \omega^{\beta} \cos\left(\frac{\pi}{2}(\alpha-\beta)\right)} \\ G''(\omega) &= \frac{C_{\alpha} \omega^{\alpha} C_{\beta} \omega^{\beta} [C_{\beta} \omega^{\beta} \sin\left(\frac{\pi}{2}\alpha\right) + C_{\alpha} \omega^{\alpha} \sin\left(\frac{\pi}{2}\beta\right)]}{(C_{\alpha} \omega^{\alpha})^2 + (C_{\beta} \omega^{\beta})^2 + 2C_{\alpha} \omega^{\alpha} C_{\beta} \omega^{\beta} \cos\left(\frac{\pi}{2}(\alpha-\beta)\right)}\end{aligned}$$

(d) Generalized Maxwell Model + Fractional Springpot

$$\begin{aligned}\hat{G}(\omega) &= G' + iG'' = \int_{-\infty}^{\infty} H(\tau) \frac{i\omega\tau}{1+i\omega\tau} d\ln\tau + C_{\beta} (i\omega)^{\beta} \\ G'(\omega) &= \int_{-\infty}^{\infty} H(\tau) \frac{(\omega\tau)^2}{1+(\omega\tau)^2} d\ln\tau + C_{\beta} \omega^{\beta} \cos\left(\frac{2\pi}{2}\right) \\ G''(\omega) &= \int_{-\infty}^{\infty} H(\tau) \frac{\omega\tau}{1+(\omega\tau)^2} d\ln\tau + C_{\beta} \omega^{\beta} \sin\left(\frac{2\pi}{2}\right)\end{aligned}$$

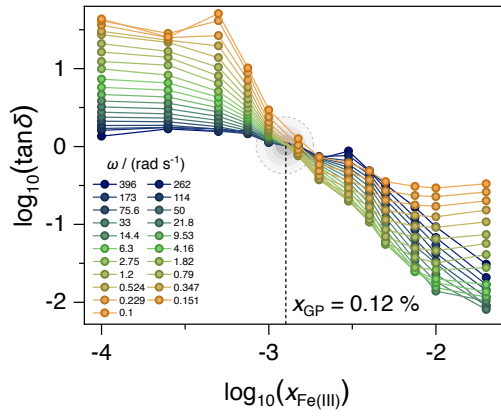

**Figure S1.** Application of the Winter-Chambon criterion for Fe-PAA hydrogels: at the gel point ( $x_{\text{Fe(III)}} = n_{\text{Fe(III)}}/n_{\text{PAA}} = 0.12\%$ ) the loss factor  $\tan \delta = G''/G'$  becomes frequency independent, resulting in a crossover when  $\tan \delta$  is plotted against the crosslinker fraction. [1]

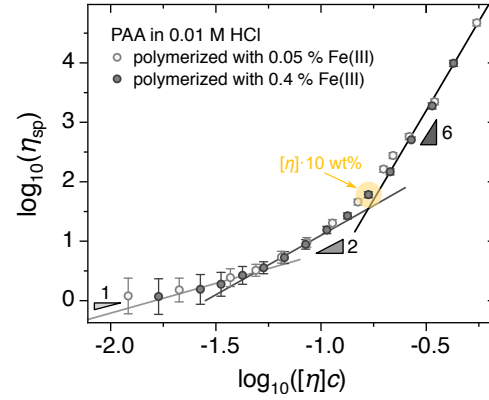

**Figure S2.** Specific viscosity  $\eta_{\text{sp}} = (\eta_0 - \eta_{\text{solvent}})/\eta_{\text{solvent}}$  of pure PAA solutions as a function of the quantity  $c[\eta]$ , for two molar fractions (relative to monomer) of ferric ions present during polymerization.  $c$  was varied from 1 wt% to 30 wt%. Intrinsic viscosities  $[\eta]$  were determined by using the Martin equation  $\log_{10}(\eta_{\text{sp}}/c) = \log_{10}[\eta] + K[\eta]c$ . [2] The weight fraction 10% used in the hydrogel samples is indicated.

## ESI2 Molar mass estimation of PAA

**Experimental:** Molar masses of the PAA gels were estimated via a diffusion coefficient measurement. A calibration with commercially available PAA of different molar masses (Sigma-Aldrich: 2000 g/mol, 5100 g/mol, 15000 g/mol, 250000 g/mol; Polysciences: 50000 g/mol) was conducted for this purpose. All Fe(III) from two samples with 0.05% and 0.4% was removed by dialysis as explained in the main text. Dilute PAA solutions with 0.5 wt% polymer were prepared with acidic 0.1 M DCl solution in  $\text{D}_2\text{O}$  in order to ensure full protonation. PFG-NMR measurements were measured on a 400 MHz NMR spectrometer (AVANCE III HD 400, Bruker BioSpin, Ettlingen, Germany), equipped with a gradient probe head (DIFFBB, Bruker BioSpin). Signal attenuation of the PAA signal was obtained in a stimulated echo pulse sequence, where the maximum gradient strength  $G$  was varied from 2 T/m to 4 T/m, while the gradient pulse duration and diffusion time were chosen as  $\delta = 1$  ms and  $\Delta = 100$  ms, respectively.

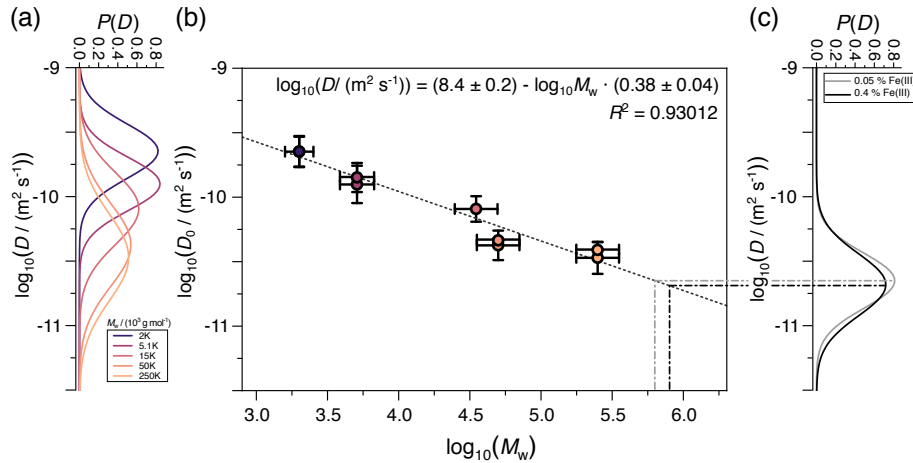

**Figure S3.** Estimation of the PAA molar mass by means of a diffusion NMR spectroscopy calibration. (a) Diffusion coefficient distributions for commercial PAA samples with  $M_w$ , as reported by the manufacturer. (b) Calibration curve of the principal diffusion coefficient  $D_0$ . (c) Diffusion coefficient distributions of two PAA samples with different ferric ion fractions present during polymerization.

**Analysis:** The concept of a pulsed field gradient-NMR experiment is described in [3]. As reported in literature [4, 5], the signal attenuation curves of polymers in dilute solution can be modelled by assuming a probability distribution  $P(D)$  of diffusion coefficients:

$$\frac{I}{I_0} = \int_{-\infty}^{\infty} P(D) \exp \left[ -(\gamma^2 G^2 \delta^2 (\Delta - \delta/3)) \cdot D \right] d \ln D, \quad (1)$$

where  $\gamma$  is the gyromagnetic ratio of the  $^1\text{H}$  nucleus. Commonly, a log-normal distribution is assumed for  $P(D)$ :

$$P(D) = \frac{1}{\sqrt{2\pi}\sigma} \exp \left[ -\frac{(\ln D - \ln D_0)^2}{2\sigma^2} \right]. \quad (2)$$

Fig. S3(a,b) shows the probability distributions and a calibration curve relating the principal diffusion coefficient of several commercial PAA samples to  $M_w$ , as reported by the manufacturer. Fig. S3(c) shows  $P(D)$  for two PAA-samples where ferric ions were removed by dialysis, leading to an estimate of  $M_{w,0.05} = (7 \pm 2) \cdot 10^5 \text{ g mol}^{-1}$  and  $M_{w,0.4} = (6 \pm 2) \cdot 10^5 \text{ g mol}^{-1}$ .

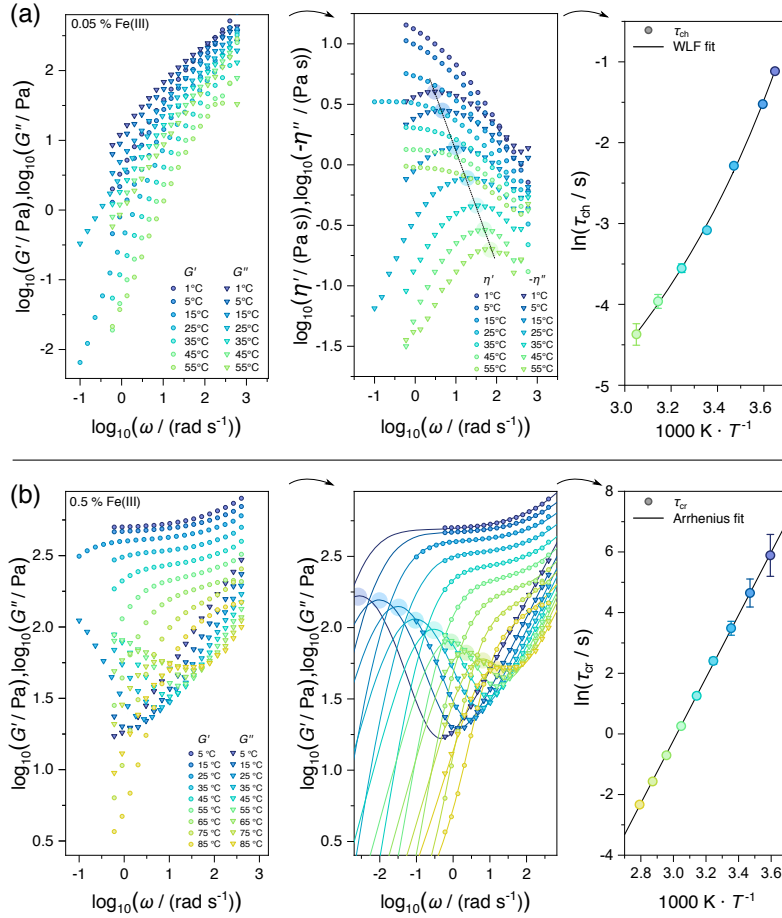

**Figure S4.** Examples for the determination of temperature-dependent relaxation times: **(a)**  $\tau_{ch}$  for a sample below the gel point ( $x_{\text{Fe(III)}} = 0.05\%$ ). The complex shear modulus is converted to the complex viscosity by  $\hat{\eta} = \hat{G}/(i\omega)$ , where the imaginary part  $-\eta''$  shows a maximum at  $\omega = \tau_{ch}^{-1}$ . The relaxation times, displayed as filled circles, are then fitted with the Williams-Landel-Ferry equation (10). **(b)**  $\tau_{cr}$  for a sample above the gel point ( $x_{\text{Fe(III)}} = 0.5\%$ ). Here,  $G''$  shows a maximum at  $\omega = \tau_{cr}^{-1}$ , which can be extrapolated by the use of the model discussed in the main text if no apparent maximum is visible. The relaxation times  $\tau_{cr}$  are fitted to an Arrhenius model.

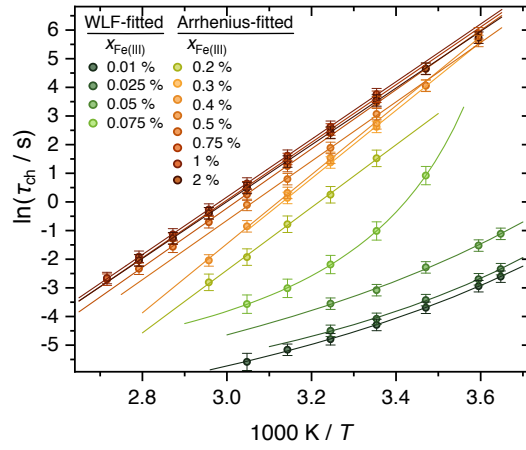

**Figure S5.** Arrhenius plot of all relaxation times determined directly from raw data for samples below the gel point ( $\tau_{ch}$ , from maximum of  $-\eta''$ ) and above the gel point ( $\tau_{cr}$ , from maximum of  $G''$ ), respectively.

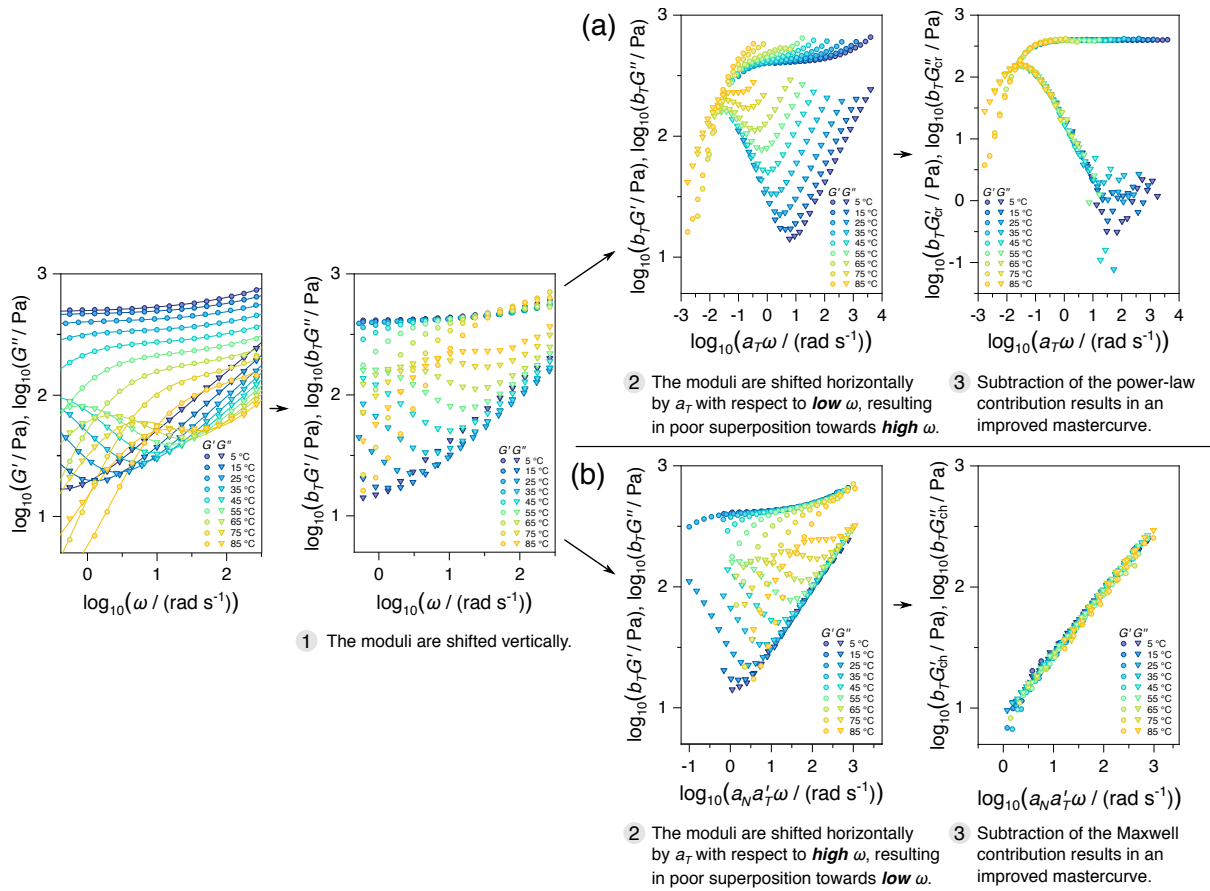

**Figure S6.** Example for time temperature superposition of separate relaxation modes ( $X_{\text{Fe(III)}} = 0.5\%$ ). After vertical shifting, horizontal shifting towards (a) low  $\omega$  or (b) high  $\omega$  fails to superimpose the dynamic moduli adequately across the entire  $\omega$ -range. Subtracting of either the high-frequency or low-frequency contribution, respectively, improves the superposition quality.

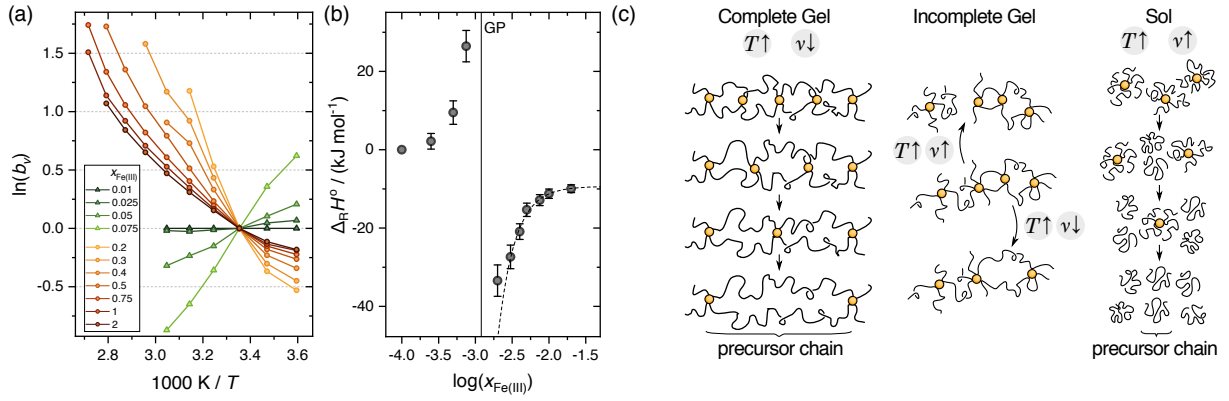

**Figure S7.** (a) Vertical shift factors  $b_v$  obtained from experimental shift factors  $b_T$  by  $b_T = b_v T_{ref}/T$ . (b) Enthalpy values obtained from the local slope at 25 °C from the relation  $\ln(b_v) = \ln(\nu(T_{ref})/\nu(T)) = (\Delta_R H^0/R) \cdot (T^{-1} - T_{ref}^{-1})$ . As this approximation is valid for networks far above the gel point, data are extrapolated with an exponential fit to obtain  $\Delta_R H^0 = 9.4 \text{ kJ mol}^{-1}$  for  $x_{Fe(III)} \rightarrow \infty$ . (c) Sketch explaining the reversal of  $b_v$ : in a complete gel, the number density  $\nu$  of network chains decreases with increasing  $T$  as crosslinks break; in an incomplete gel just above the gel point, crosslink dissociation leads both to an increase or decrease in  $\nu$ , depending on the connectivity of the crosslink; in the sol,  $\nu$  of isolated chains increases with increasing  $T$ .

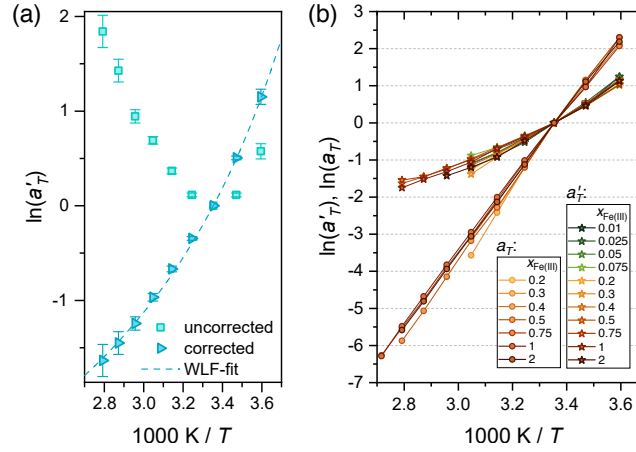

**Figure S8.** (a) Horizontal shift factors  $a'_T$  obtained from high-frequency guided time-temperature superposition, before and after correction by an additional shift factor  $a_N = b_v^2$ . (b) Summary of all horizontal shift factors  $a_T$  (low-frequency guided TTS) and  $a'_T$  (high-frequency guided TTS) for different ferric ion fractions. Lines between points are guide to the eye.

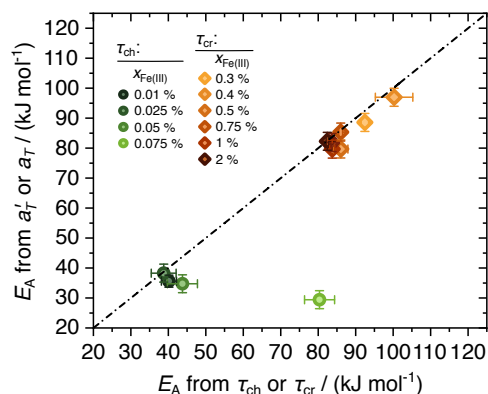

**Figure S9.** Comparison of activation energies determined by two methods: 1. from  $T$ -dependent terminal relaxation times  $\tau_{ch}$  (Rouse relaxation time of chains),  $\tau_{cr}$  (relaxation time of crosslink dissociation) and 2. from time temperature superposition. Values for samples below the gel point are represented as circles, for samples above the gel point as diamonds.

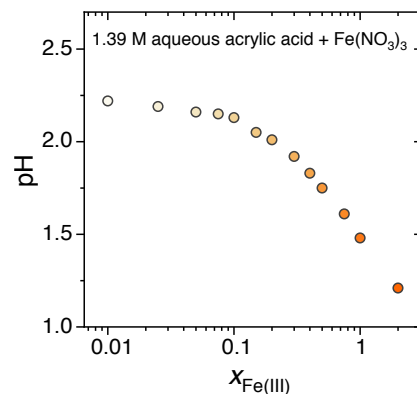

**Figure S10.** Solution pH of aqueous acrylic acid (10 wt%, corresponding to 1.39 M) with different molar fractions (relative to acrylic acid) of  $\text{Fe}(\text{NO}_3)_3$ .

### ESI3 Comment on the equivalence of VFT and WLF approaches

The Williams-Landel-Ferry formalism is a common method to model the temperature dependence of the reduced relaxation time in viscoelastic polymer materials: [6]

$$\log_{10} \left( \frac{\tau(T)}{\tau(T_{\text{ref}})} \right) = \frac{-C_1(T - T_{\text{ref}})}{C_2 + (T - T_{\text{ref}})}, \quad (3)$$

where  $C_1$ ,  $C_2$  are fit parameters. This expression is equivalent to the Vogel-Fulcher-Tammann (VFT) equation, which is common in literature discussing dielectric relaxation [7, 8] or the viscosity of glass-forming liquids [9]:

$$\tau(T) = \tau_0 \exp \left( \frac{B}{T - T_0} \right), \quad (4)$$

where  $\tau_0$  and  $B$  are fit parameters and  $T_0$  is the Vogel-temperature. The fit parameters of both models can be related by:

$$C_1 = B / (T_{\text{ref}} - T_0) \quad (5)$$

$$C_2 = (T_{\text{ref}} - T_0) \quad (6)$$

### References

- (1) H. H. Winter, in *Encyclopedia of Polymer Science and Technology*, Wiley, 2002, vol. 10, pp. 132–144.
- (2) W.-M. Kulicke and C. Clasen, *Viscosimetry of polymers and polyelectrolytes*, Springer Science & Business Media, 2004.
- (3) Y. Cohen, L. Avram and L. Frish, “Diffusion NMR spectroscopy in supramolecular and combinatorial chemistry: an old parameter—new insights”, *Angewandte Chemie International Edition*, 2005, **44**, 520–554.
- (4) X. Guo, E. Laryea, M. Wilhelm, B. Luy, H. Nirschl and G. Guthausen, “Diffusion in Polymer Solutions: Molecular Weight Distribution by PFG-NMR and Relation to SEC”, *Macromolecular Chemistry and Physics*, 2017, **218**, 1600440.
- (5) M. Röding, D. Bernin, J. Jonasson, A. Särkkä, D. Topgaard, M. Rudemo and M. Nydén, “The gamma distribution model for pulsed-field gradient NMR studies of molecular-weight distributions of polymers”, *Journal of Magnetic Resonance*, 2012, **222**, 105–111.
- (6) J. D. Ferry, *Viscoelastic properties of polymers*, John Wiley & Sons, New York, Third edition, 1980.
- (7) M. Tress, K. Xing, S. Ge, P. Cao, T. Saito and A. Sokolov, “What dielectric spectroscopy can tell us about supramolecular networks”, *The European Physical Journal E*, 2019, **42**, 1–12.
- (8) F. Stickel, E. W. Fischer and R. Richert, “Dynamics of glass-forming liquids. I. Temperature-derivative analysis of dielectric relaxation data”, *The Journal of Chemical Physics*, 1995, **102**, 6251–6257.
- (9) C. A. Angell, C. T. Imrie and M. D. Ingram, “From simple electrolyte solutions through polymer electrolytes to superionic rubbers: some fundamental considerations”, *Polymer International*, 1998, **47**, 9–15.
